# Supplementary material for: Biosynthesis of aminoglycoside antibiotics: cloning, expression and characterisation of an aminotransferase involved in the pathway to 2-deoxystreptamineElectronic supplementary information (ESI) available: LC-MS, TLC and ESI-Q-TOF MS. See http://www.rsc.org/suppdata/cc/b2/b209799k/
Source: Royal Society of Chemistry journal article supplement (doi:10.1039/b209799k), 2002-11-05
Supplement: b209799k.doc [file b209799k.doc]

**Supplementary information**

1. **LC-MS analysis of BtrR**

**A**: LC-TIC profile

**B**: LC-UV (280 nm) profile

**C**: Mass spectrum

**D**: Deconvoluted spectrum (minus the 1st Met: measured 50714.0+11.2, calculated 50702.8)


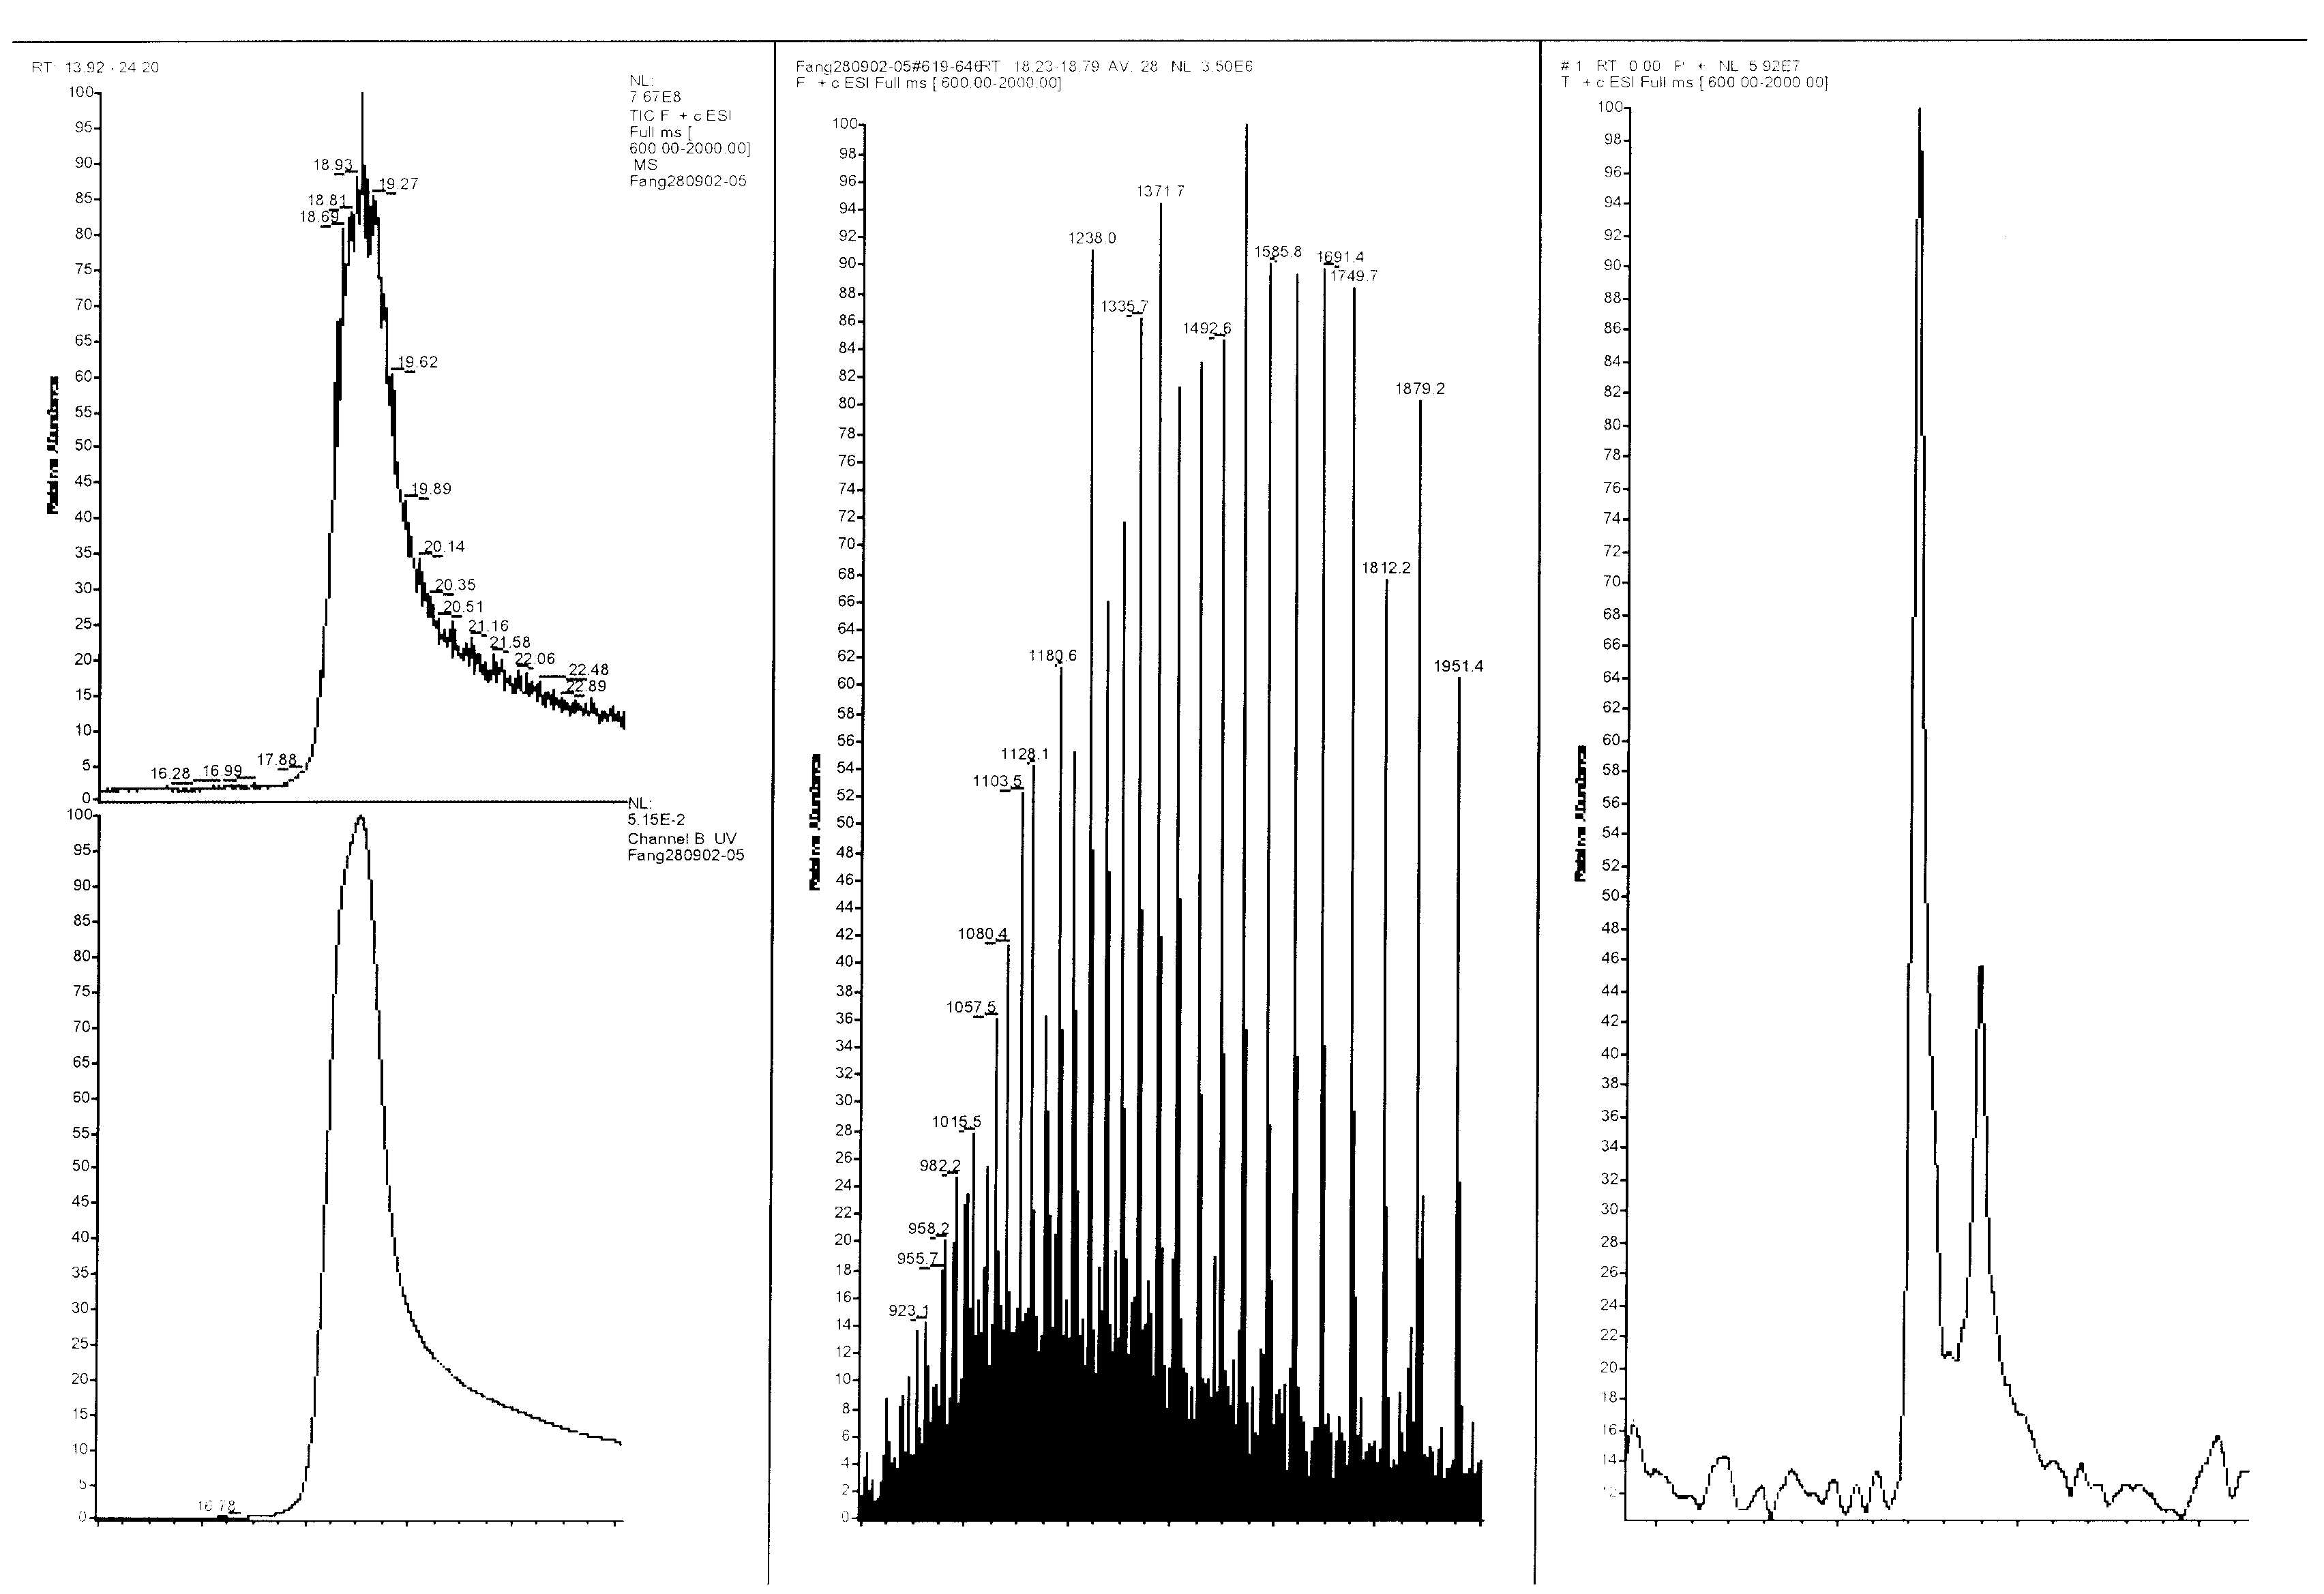


14 16 18 20 22 24

Time (min)

800 1000 1200 1400 1600 1800 2000

50000 50500 51000 51500

mass

m/z

**50714.0**

1. **TLC analysis of the BtrR-catalysed transamination (overnight incubation at 37º).**  **A**. Forward reactions. Amino donors used are indicated; C1: without enzyme; C2: without 2-deoxy-scyllo-inosose (**2**); C3: without amino donor; Std: 2-deoxy-scyllo-inosamine (**3**) standard. **B**. Reverse reactions. Amino acceptors used are indicated; C1: without enzyme; C2: without 2-deoxystreptamine (**5**); C3: without amino acceptor; Std: **3** and **5** standards.

**2**

**5**

**L-alanine**


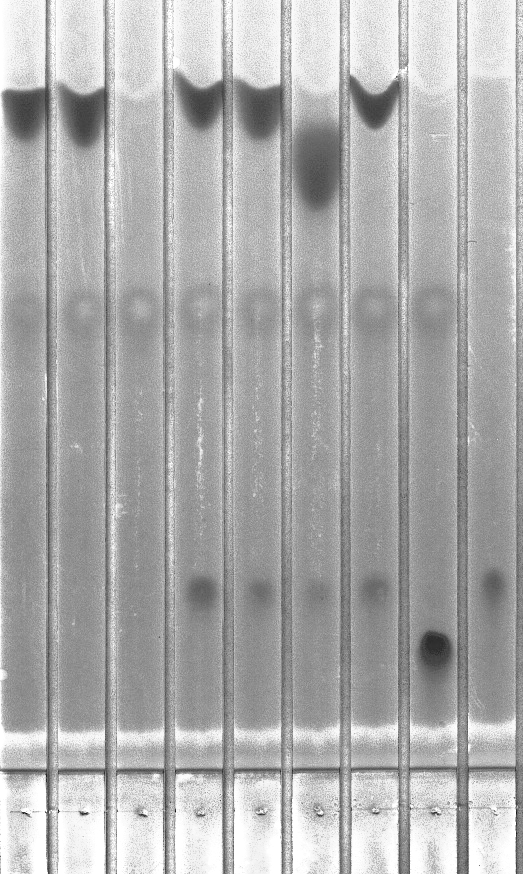

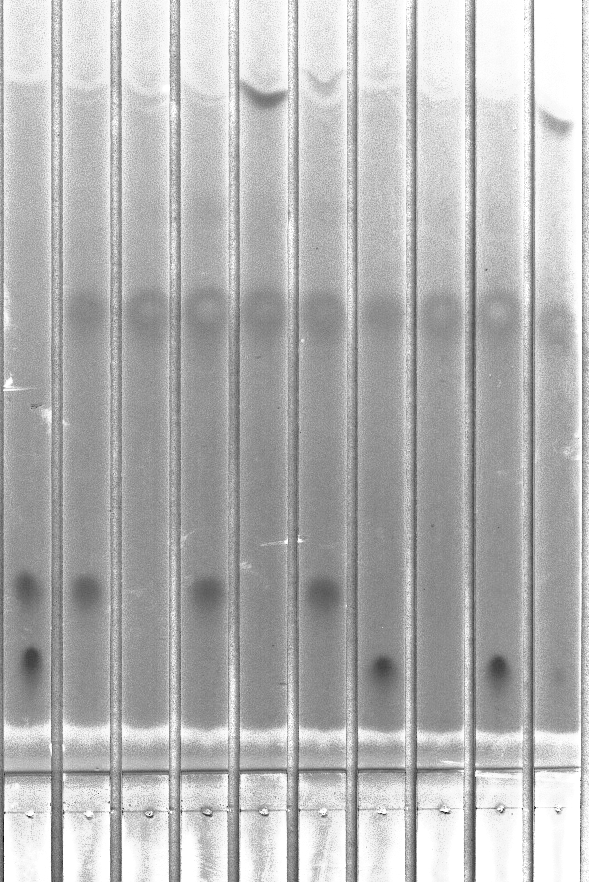


**C1 C2 C3 Gln Ala Ser Glu Arg Std**

**2**

**Std C1 C2 C3 Pyr Std C1 C2 C3 Pyr**

**A**

**B**

1. **ESI-Q-TOF MS Analysis of the Putative Product (2-deoxy-*scyllo*-inosamine, DOIA) from BtrR-Catalysed Forward Reaction.** 164.1 [M+H+], 186.1 [M+Na+], 349.2 [2M+Na+]. **A**: synthetic DOIA standard; **B**:HPLC-purified product.


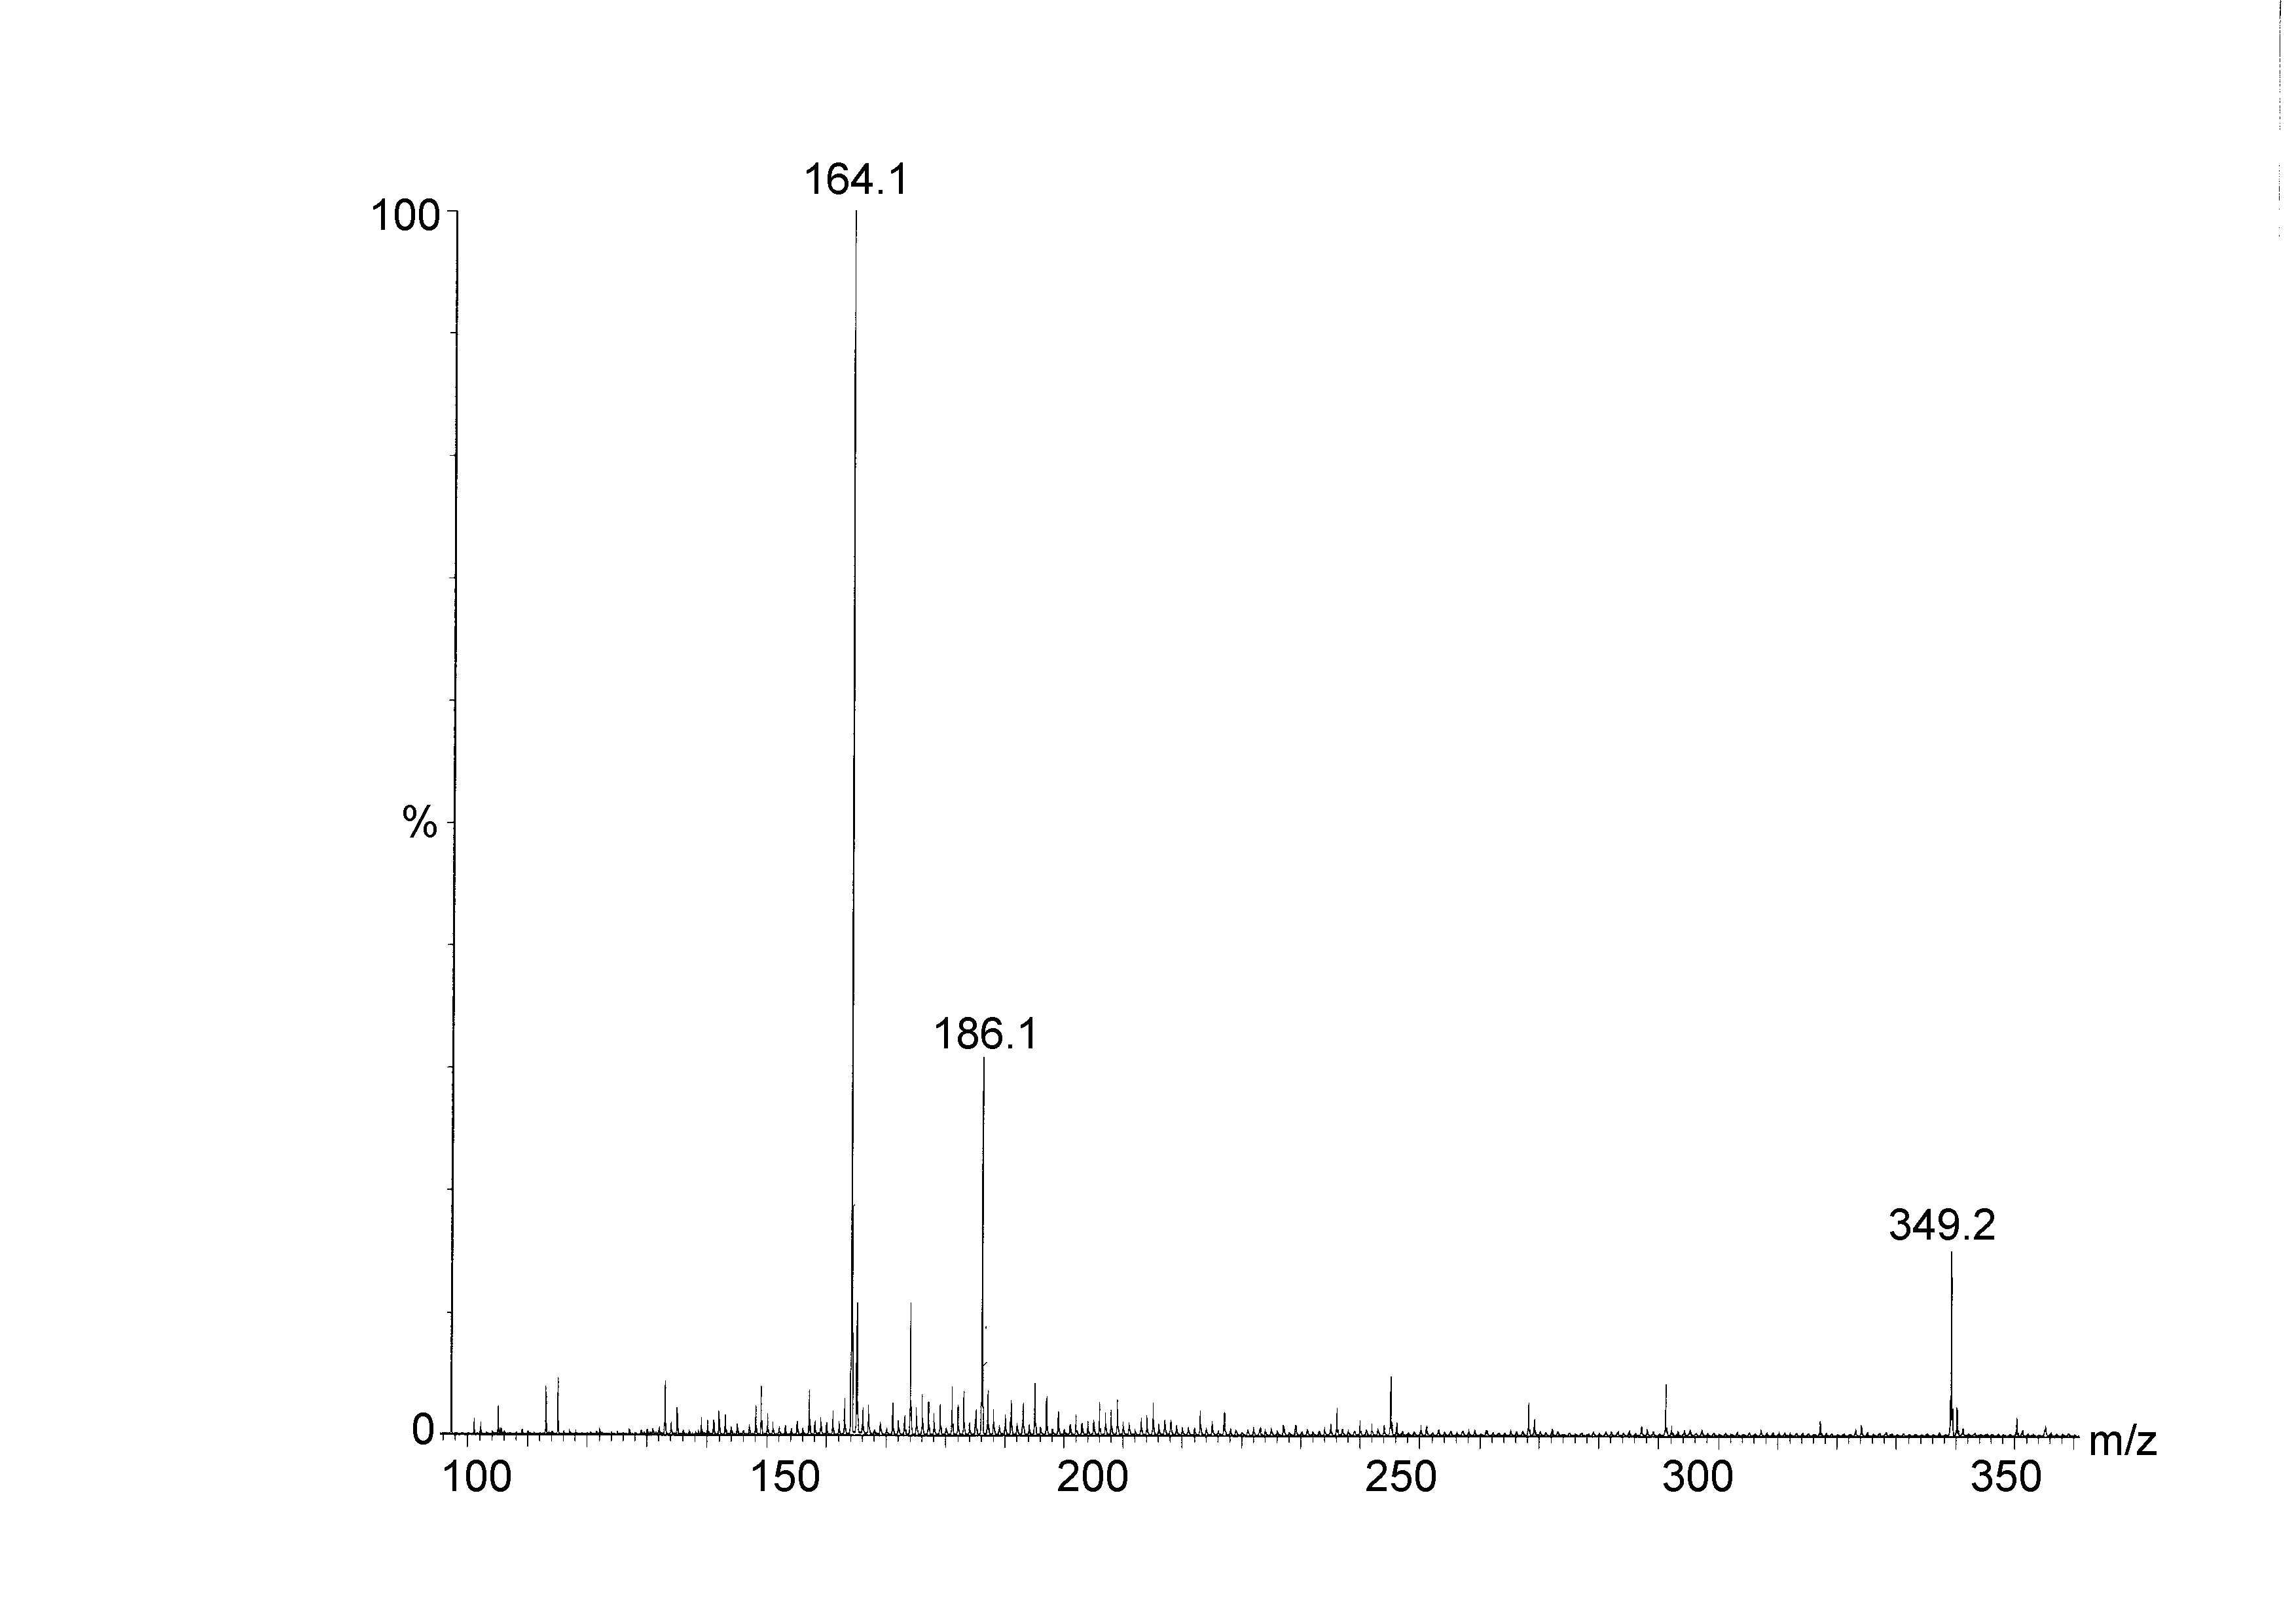

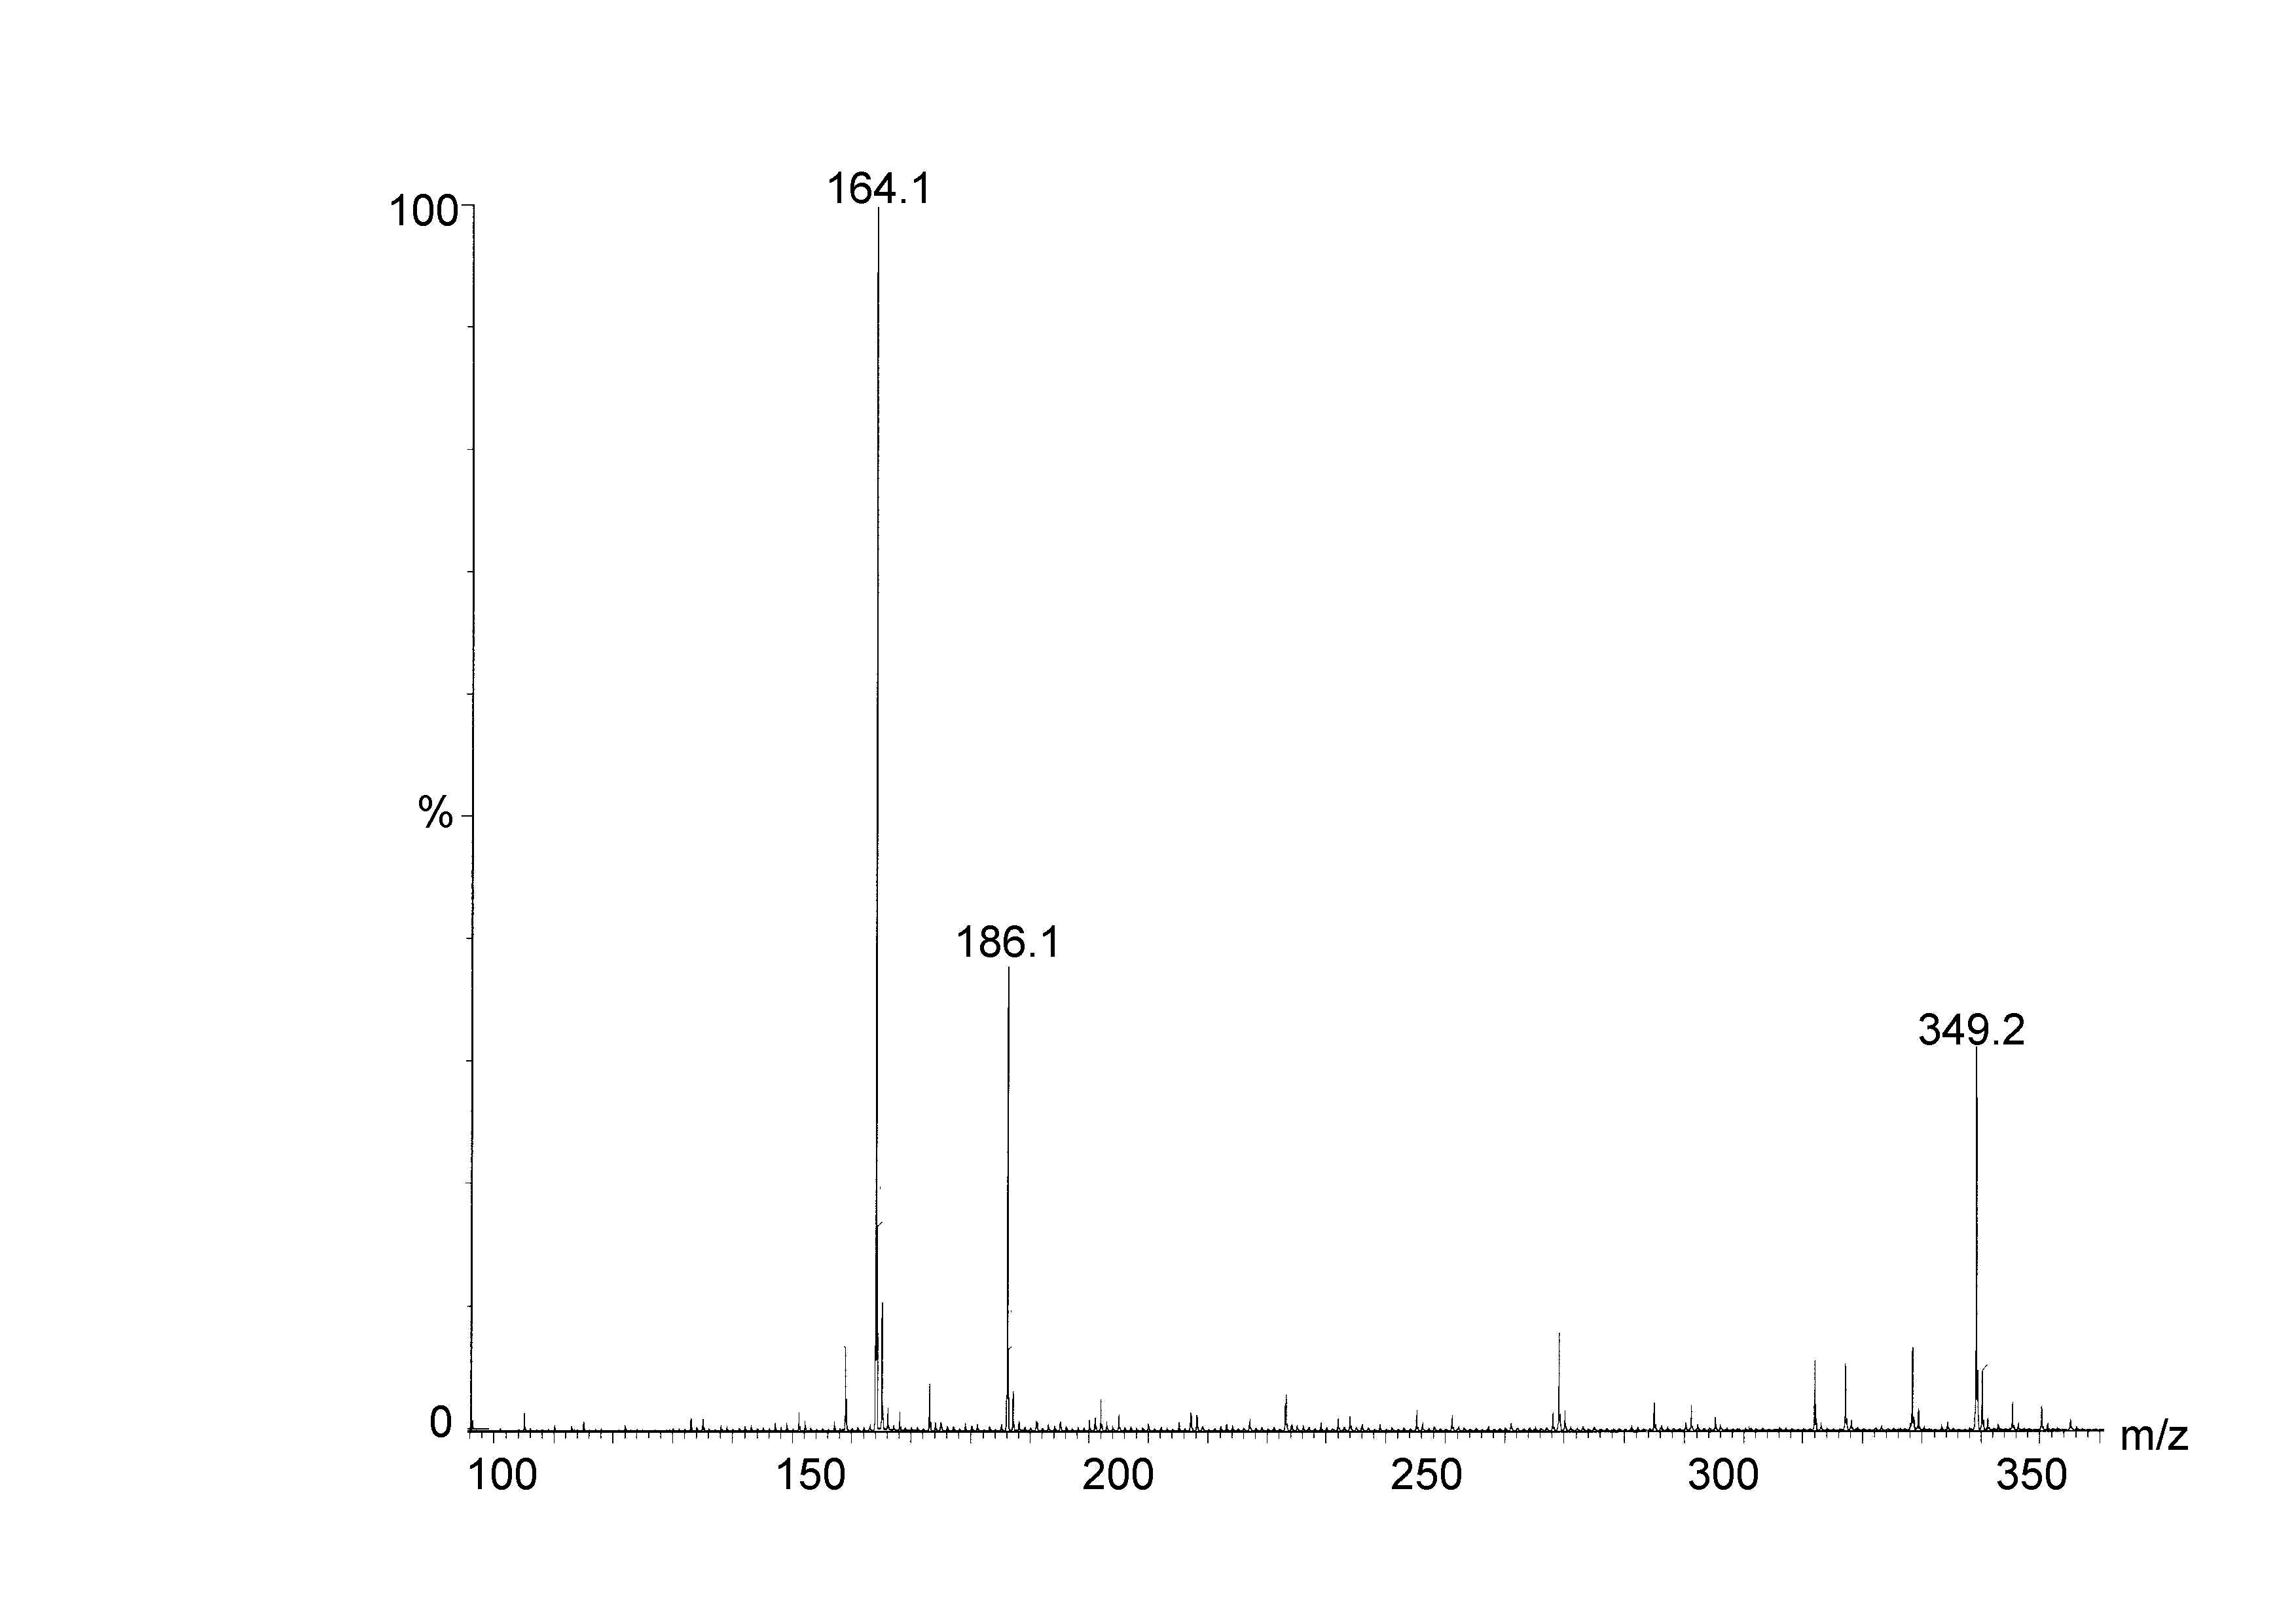


**A**

**B**
